# Supplementary material
Source: MDPI journal article supplement (https://www.mdpi.com/2073-4344/10/3/329)
Supplement: s1 [file s1]

## Sheet: DATAS1
Data S1
The data used to build Figure 1.B was extracted from following resources:
Insect	http://www.insect-genome.com/
Moss	https://db.cngb.org/onekp/
Barley	https://webblast.ipk-gatersleben.de/barley_ibsc/
Others,	https://www.ncbi.nlm.nih.gov/.

## Sheet: DATAS2
Data S2_ Sequences employed in alignment for Figure 2. Sequences from Barley, https://webblast.ipk-gatersleben.de/barley_ibsc/; Others, https://www.ncbi.nlm.nih.gov/.
>AT1G04180_Org_Athaliana_peptide:_AT1G04180.1_YUCCA_9_(PAC:19650032)
>AT1G04610_Org_Athaliana_peptide:_AT1G04610.1_YUCCA_3_(PAC:19656339)
>AT1G12130_Org_Athaliana_peptide:_AT1G12130.1_Flavinbinding_monooxygenase_family_protein_(PAC:19651576)
>AT1G12140_Org_Athaliana_peptide:_AT1G12140.1_flavinmonooxygenase_glucosinolate_Soxygenase_5_(PAC:19652961)
>AT1G12160_Org_Athaliana_peptide:_AT1G12160.1_Flavinbinding_monooxygenase_family_protein_(PAC:19658073)
>AT1G12200_Org_Athaliana_peptide:_AT1G12200.1_Flavinbinding_monooxygenase_family_protein_(PAC:19651062)
>AT1G19250_Org_Athaliana_peptide:_AT1G19250.1_flavindependent_monooxygenase_1_(PAC:19653259)
>AT1G21430_Org_Athaliana_peptide:_AT1G21430.1_Flavinbinding_monooxygenase_family_protein_(PAC:19652923)
>AT1G48910_Org_Athaliana_peptide:_AT1G48910.1_Flavincontaining_monooxygenase_family_protein_(PAC:19650348)
>AT1G62540_Org_Athaliana_peptide:_AT1G62540.1_flavinmonooxygenase_glucosinolate_Soxygenase_2_(PAC:19657966)
>AT1G62560_Org_Athaliana_peptide:_AT1G62560.1_flavinmonooxygenase_glucosinolate_Soxygenase_3_(PAC:19651373)
>AT1G62570_Org_Athaliana_peptide:_AT1G62570.1_flavinmonooxygenase_glucosinolate_Soxygenase_4_(PAC:19651537)
>AT1G62600_Org_Athaliana_peptide:_AT1G62600.1_Flavinbinding_monooxygenase_family_protein_(PAC:19658148)
>AT1G62620_Org_Athaliana_peptide:_AT1G62620.1_Flavinbinding_monooxygenase_family_protein_(PAC:19649772)
>AT1G63340_Org_Athaliana_peptide:_AT1G63340.1_Flavincontaining_monooxygenase_family_protein_(PAC:19652873)
>AT1G63370_Org_Athaliana_peptide:_AT1G63370.1_Flavinbinding_monooxygenase_family_protein_(PAC:19650646)
>AT1G65860_Org_Athaliana_peptide:_AT1G65860.1_flavinmonooxygenase_glucosinolate_Soxygenase_1_(PAC:19656840)
>AT2G33230_Org_Athaliana_peptide:_AT2G33230.1_YUCCA_7_(PAC:19643189)
>AT4G13260_Org_Athaliana_peptide:_AT4G13260.1_Flavinbinding_monooxygenase_family_protein_(PAC:19648111)
>AT4G28720_Org_Athaliana_peptide:_AT4G28720.1_Flavinbinding_monooxygenase_family_protein_(PAC:19645923)
>AT4G32540_Org_Athaliana_peptide:_AT4G32540.1_Flavinbinding_monooxygenase_family_protein_(PAC:19645242)
>AT5G07800_Org_Athaliana_peptide:_AT5G07800.1_Flavinbinding_monooxygenase_family_protein_(PAC:19673281)
>AT5G11320_Org_Athaliana_peptide:_AT5G11320.1_Flavinbinding_monooxygenase_family_protein_(PAC:19665818)
>AT5G11320_Org_Athaliana_peptide:_AT5G11320.2_Flavinbinding_monooxygenase_family_protein_(PAC:19665819)
>AT5G25620_Org_Athaliana_peptide:_AT5G25620.1_Flavinbinding_monooxygenase_family_protein_(PAC:19672111)
>AT5G25620_Org_Athaliana_peptide:_AT5G25620.2_Flavinbinding_monooxygenase_family_protein_(PAC:19672110)
>AT5G43890_Org_Athaliana_peptide:_AT5G43890.1_Flavinbinding_monooxygenase_family_protein_(PAC:19667055)
>AT5G45180_Org_Athaliana_peptide:_AT5G45180.1_Flavinbinding_monooxygenase_family_protein_(PAC:19669949)
>AT5G61290_Org_Athaliana_peptide:_AT5G61290.1_Flavinbinding_monooxygenase_family_protein_(PAC:19673203)
>HORVU0Hr1G001150 Org_Hvulgareearlyrelease peptide: HORVU0Hr1G001150.2 (PAC:38340391)
>HORVU0Hr1G009230 Org_Hvulgareearlyrelease peptide: HORVU0Hr1G009230.1 (PAC:38340582)
>HORVU0Hr1G009230 Org_Hvulgareearlyrelease peptide: HORVU0Hr1G009230.2 (PAC:38340583)
>HORVU0Hr1G031640 Org_Hvulgareearlyrelease peptide: HORVU0Hr1G031640.2 (PAC:38340622)
>HORVU1Hr1G001160 Org_Hvulgareearlyrelease peptide: HORVU1Hr1G001160.1 (PAC:38482784)
>HORVU1Hr1G022530 Org_Hvulgareearlyrelease peptide: HORVU1Hr1G022530.34 (PAC:38475057)
>HORVU1Hr1G022670 Org_Hvulgareearlyrelease peptide: HORVU1Hr1G022670.1 (PAC:38481418)
>HORVU1Hr1G023160 Org_Hvulgareearlyrelease peptide: HORVU1Hr1G023160.1 (PAC:38465975)
>HORVU1Hr1G053900 Org_Hvulgareearlyrelease peptide: HORVU1Hr1G053900.1 (PAC:38478865)
>HORVU1Hr1G067720 Org_Hvulgareearlyrelease peptide: HORVU1Hr1G067720.2 (PAC:38465583)
>HORVU1Hr1G078200 Org_Hvulgareearlyrelease peptide: HORVU1Hr1G078200.2 (PAC:38461902)
>HORVU1Hr1G091130 Org_Hvulgareearlyrelease peptide: HORVU1Hr1G091130.10 (PAC:38460093)
>HORVU2Hr1G001820 Org_Hvulgareearlyrelease peptide: HORVU2Hr1G001820.1 (PAC:38361650)
>HORVU2Hr1G009900 Org_Hvulgareearlyrelease peptide: HORVU2Hr1G009900.1 (PAC:38382185)
>HORVU2Hr1G010060 Org_Hvulgareearlyrelease peptide: HORVU2Hr1G010060.3 (PAC:38379694)
>HORVU2Hr1G116980 Org_Hvulgareearlyrelease peptide: HORVU2Hr1G116980.1 (PAC:38375023)
>HORVU2Hr1G118750 Org_Hvulgareearlyrelease peptide: HORVU2Hr1G118750.1 (PAC:38359857)
>HORVU2Hr1G118760 Org_Hvulgareearlyrelease peptide: HORVU2Hr1G118760.2 (PAC:38365212)
>HORVU3Hr1G030390 Org_Hvulgareearlyrelease peptide: HORVU3Hr1G030390.2 (PAC:38418607)
>HORVU3Hr1G057950 Org_Hvulgareearlyrelease peptide: HORVU3Hr1G057950.1 (PAC:38407792)
>HORVU3Hr1G069580 Org_Hvulgareearlyrelease peptide: HORVU3Hr1G069580.1 (PAC:38390002)
>HORVU4Hr1G072260 Org_Hvulgareearlyrelease peptide: HORVU4Hr1G072260.1 (PAC:38575327)
>HORVU4Hr1G073700 Org_Hvulgareearlyrelease peptide: HORVU4Hr1G073700.1 (PAC:38571141)
>HORVU4Hr1G077170 Org_Hvulgareearlyrelease peptide: HORVU4Hr1G077170.1 (PAC:38569990)
>HORVU4Hr1G087900 Org_Hvulgareearlyrelease peptide: HORVU4Hr1G087900.7 (PAC:38572515)
>HORVU4Hr1G089360 Org_Hvulgareearlyrelease peptide: HORVU4Hr1G089360.1 (PAC:38571988)
>HORVU5Hr1G028100 Org_Hvulgareearlyrelease peptide: HORVU5Hr1G028100.1 (PAC:38451810)
>HORVU5Hr1G050630 Org_Hvulgareearlyrelease peptide: HORVU5Hr1G050630.2 (PAC:38437186)
>HORVU5Hr1G056420 Org_Hvulgareearlyrelease peptide: HORVU5Hr1G056420.2 (PAC:38436558)
>HORVU5Hr1G086660 Org_Hvulgareearlyrelease peptide: HORVU5Hr1G086660.1 (PAC:38443930)
>HORVU5Hr1G086670 Org_Hvulgareearlyrelease peptide: HORVU5Hr1G086670.5 (PAC:38445616)
>HORVU5Hr1G086770 Org_Hvulgareearlyrelease peptide: HORVU5Hr1G086770.1 (PAC:38453699)
>HORVU5Hr1G125560 Org_Hvulgareearlyrelease peptide: HORVU5Hr1G125560.1 (PAC:38440617)
>HORVU6Hr1G019210 Org_Hvulgareearlyrelease peptide: HORVU6Hr1G019210.2 (PAC:38507644)
>HORVU6Hr1G029800 Org_Hvulgareearlyrelease peptide: HORVU6Hr1G029800.1 (PAC:38510708)
>HORVU7Hr1G007860 Org_Hvulgareearlyrelease peptide: HORVU7Hr1G007860.1 (PAC:38523273)
>HORVU7Hr1G017620 Org_Hvulgareearlyrelease peptide: HORVU7Hr1G017620.1 (PAC:38528979)
>HORVU7Hr1G017630 Org_Hvulgareearlyrelease peptide: HORVU7Hr1G017630.2 (PAC:38520901)
>HORVU7Hr1G017660 Org_Hvulgareearlyrelease peptide: HORVU7Hr1G017660.1 (PAC:38545137)
>HORVU7Hr1G017680 Org_Hvulgareearlyrelease peptide: HORVU7Hr1G017680.1 (PAC:38536901)
>HORVU7Hr1G023910 Org_Hvulgareearlyrelease peptide: HORVU7Hr1G023910.1 (PAC:38551858)
>HORVU7Hr1G121260 Org_Hvulgareearlyrelease peptide: HORVU7Hr1G121260.1 (PAC:38537364)
>XP_001758613.1_predicted_protein_Physcomitrella_patens
>BAS32646.1 S-allyl-L-cysteine S-oxygenase [Allium sativum]
